# Supplementary material for: Three-dimensionally printed pressure sensor arrays from hysteresis-less stretchable piezoresistive composites
Source: Royal Society of Chemistry journal article supplement (doi:10.1039/c9ra08461d), 2019-01-01
Supplement: c9ra08461d5.pdf [file c9ra08461d5.pdf]

## Supplementary Information

# Three-Dimensionally Printed Pressure Sensor Arrays from Hysteresis-Less Stretchable Piezoresistive Composites

Jong Hyun Kang,<sup>a,b</sup> Ju Young Kim,<sup>a</sup> Yejin Jo,<sup>a,c</sup> Hyun-Suk Kim,<sup>b</sup> Sung Mook Jung,<sup>a</sup> Su  
Yeon Lee,<sup>a</sup> Youngmin Choi,<sup>a,c,\*</sup> Sunho Jeong<sup>d,\*</sup>

<sup>a</sup>Division of Advanced Materials, Korea Research Institute of Chemical Technology (KRICT), 141 Gajeong-ro, Yuseong-gu, Daejeon 305-600, Korea

<sup>b</sup>Department of Materials Science and Engineering, College of Engineering, Chungnam National University, 99 Daehak-ro, Yuseong-gu, Daejeon 305-764, Korea.

<sup>c</sup>Department of Chemical Convergence Materials, Korea University of Science and Technology (UST), 217 Gajeong-ro, Yuseong-gu, Daejeon 305-350, Korea

<sup>d</sup>Department of Advanced Materials Engineering for Information and Electronics, Kyung Hee University, Yongin-shi, Gyeonggi-do 17104, Korea

J. H. Kang and J. Y. Kim contributed equally to this work

\*E-mail: youngmin@kRICT.re.kr (Y. Choi); sjeong@khu.ac.kr (S. Jeong)

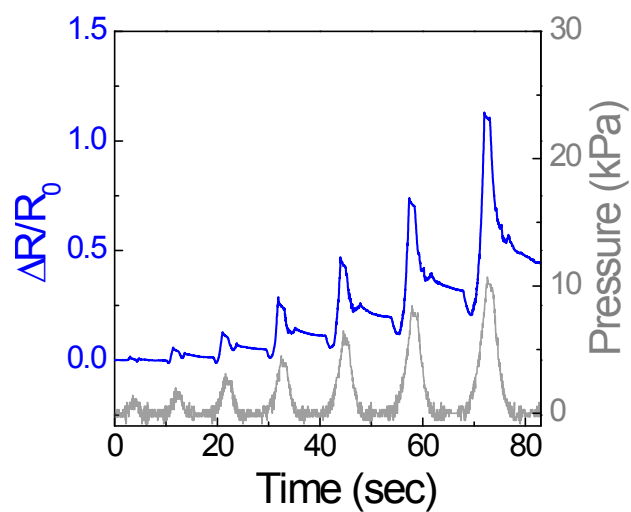

**Figure S1.** Resistance signal for the PDMS flat pressure sensor device.

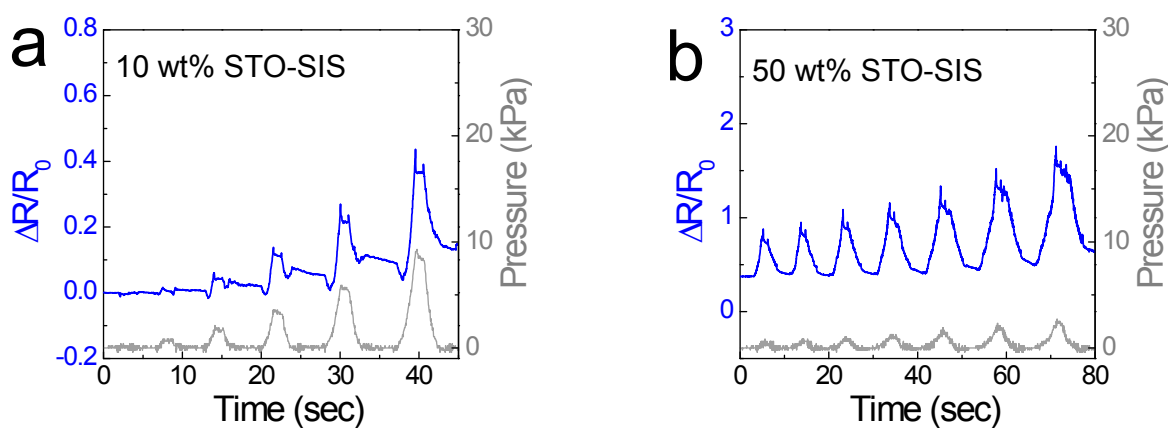

**Figure S2.** Resistance signals for (a) 10 wt% STO-SIS and 50 wt% STO-SIS flat pressure sensor devices.

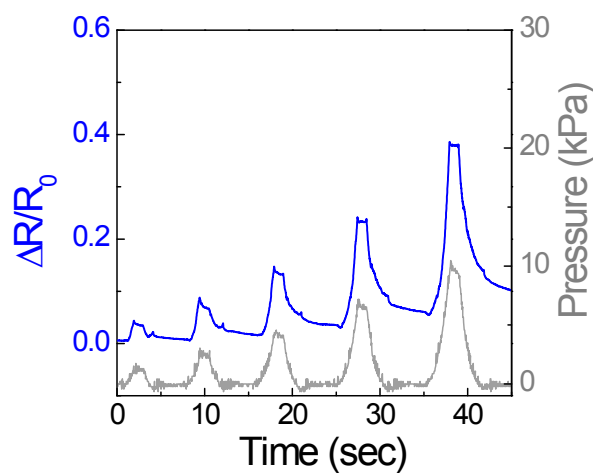

**Figure S3.** Resistance signal for the 30 wt% SML-SIS flat pressure sensor device.

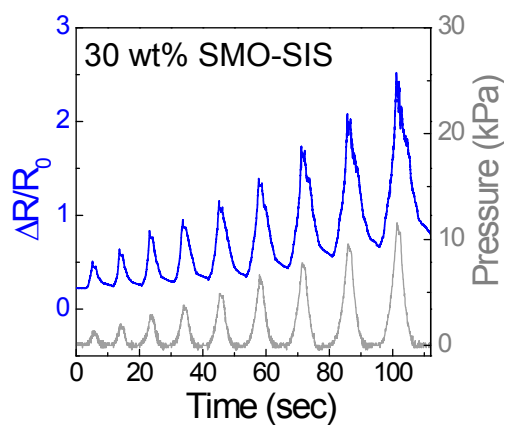

**Figure S4.** Resistance signal for the 30 wt% SMO-SIS flat pressure sensor device.

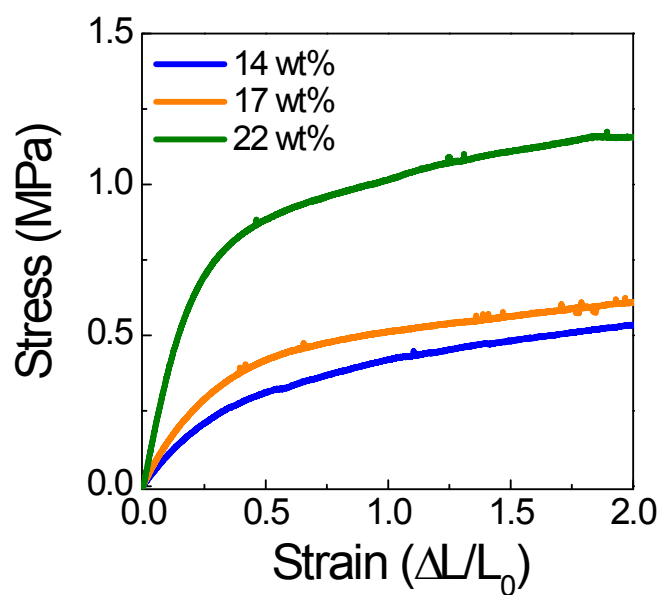

**Figure S5.** Stress-strain curves for the SIS films with styrene compositions of 14, 17, and 22 wt%.

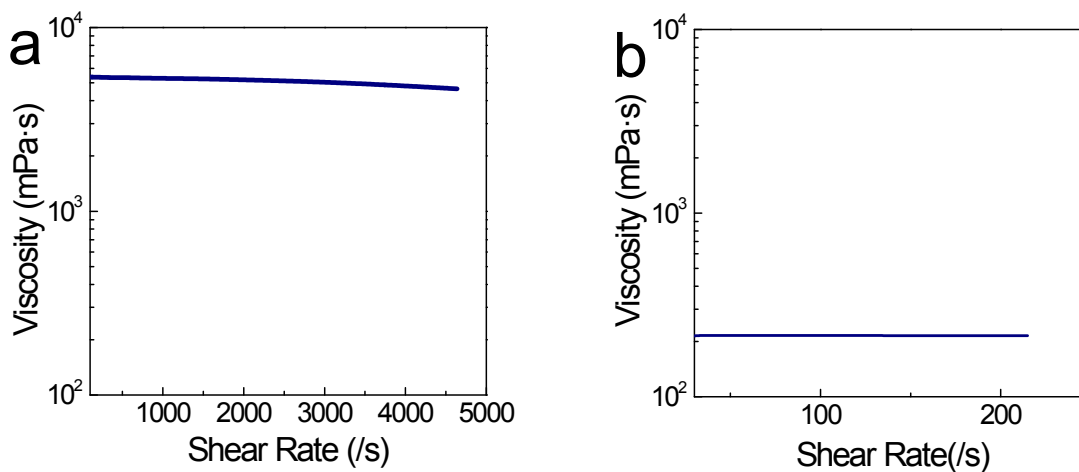

**Figure S6.** Viscosity data in relation to shear rate for (a) SML and (b) STO surfactants.

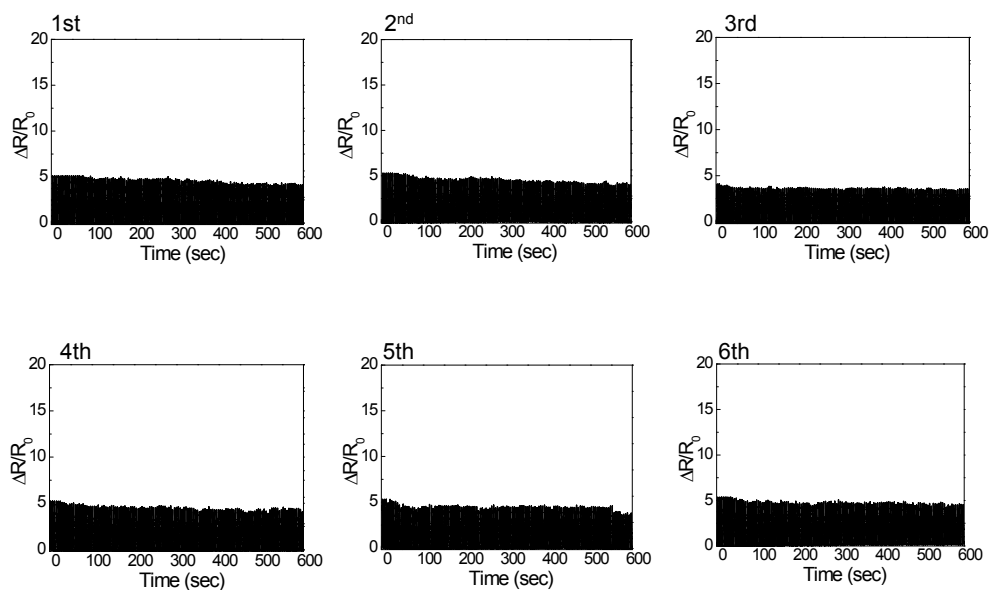

**Figure S7.** Resistance signal data for 792-times repeated measurements at a pressure of 30 kPa for the 30 wt% STO-SIS flat pressure sensor device.

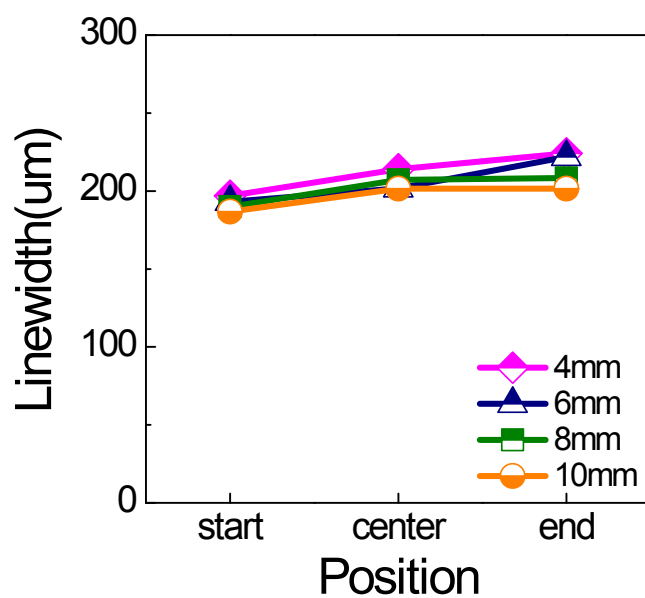

**Figure S8.** Variations in linewidth for the lines printed on top of structures with various air-gap distances.

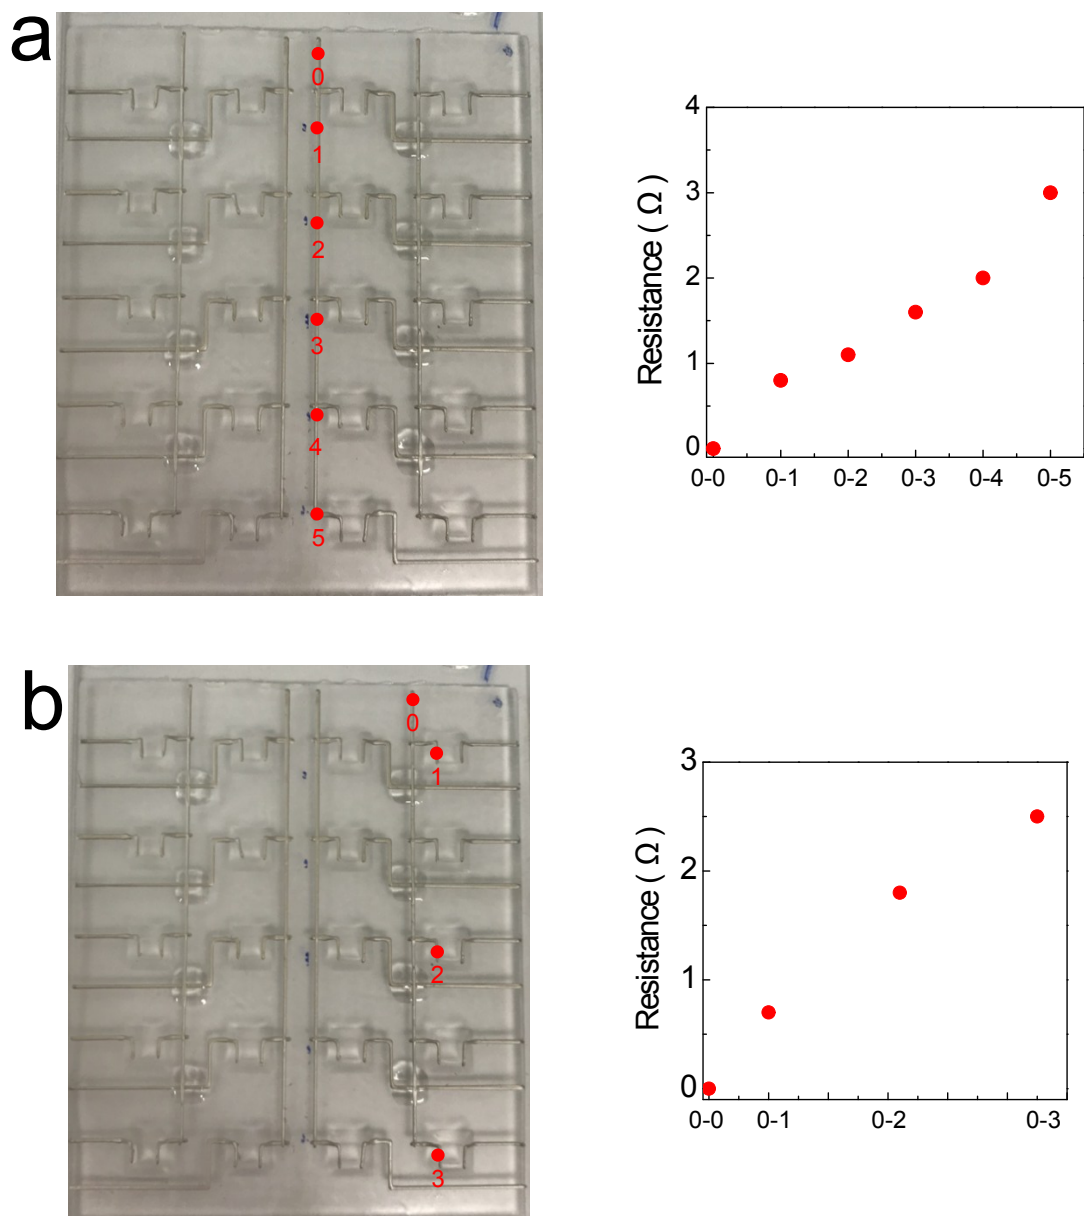

**Figure S9.** Resistance measured at various positions in the Ag electrode-printed array device (without multi-stacked sensor layers).

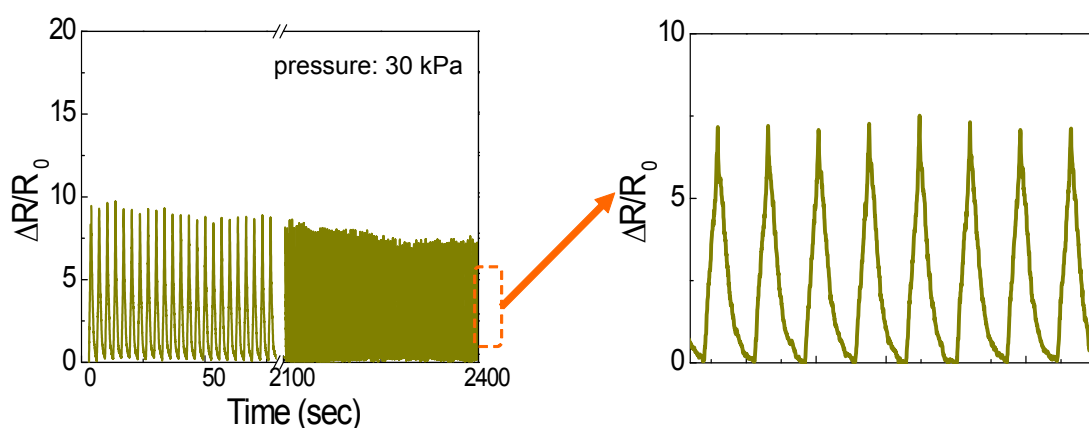

**Figure S10.** Resistance signal in 664-times repeated measurement at a pressure of 30 kPa for the 3D-printed array device.

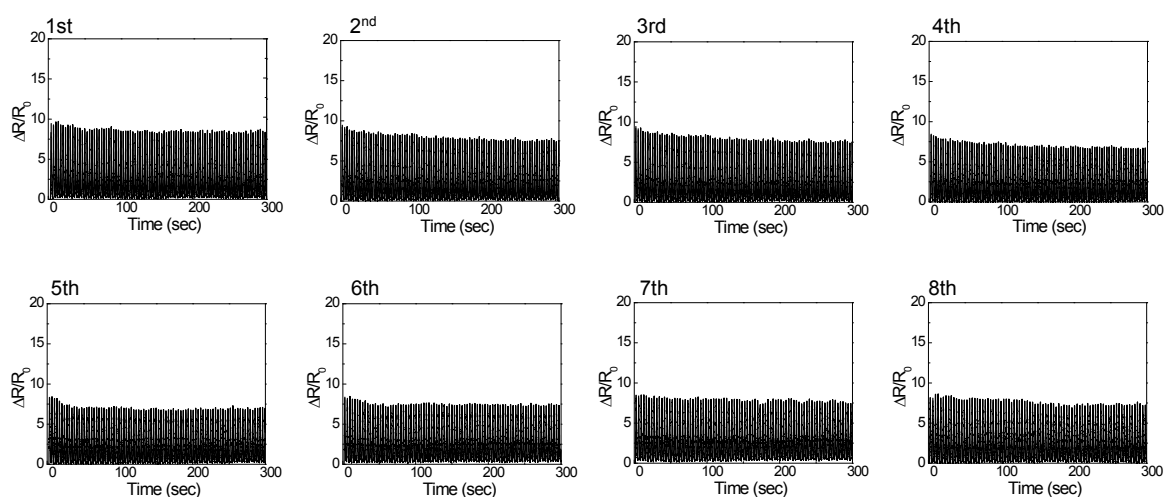

**Figure S11.** Resistance signal data in 664-times repeated measurement at a pressure of 30 kPa for the 3D-printed array device.

**Movie S1.** Motion picture of showing the 3D-printing process of Ag electrodes on the pre-structured PDMS substrate (recording speed: x2.5).

**Movie S2.** Motion picture of showing the printing process of SIS insulator parts on top of pre-printed Ag electrode lines (recording speed: x1.5).

**Movie S3.** Motion picture of showing the 3D-printing process of Ag electrodes on top of pre-stacked Ag electrode lines and SIS insulator parts (recording speed: x1.5).

**Movie S4.** Motion picture of showing the 3D-printing process of sensor layers in the array device (recording speed: x1.5). The as-printed suspending lines became flat by a solvent evaporation, prior to the next pillar printing process.
